# Supplementary material for: Kingdom-Wide Analysis of Fungal Small Secreted Proteins (SSPs) Reveals their Potential Role in Host Association
Source: Front Plant Sci. 2016 Feb 19;7:186. doi: 10.3389/fpls.2016.00186 (PMC4759460; doi:10.3389/fpls.2016.00186)
Supplement: Supplementary file 2 [file Table2.XLSX]

## Sheet: Summary
	Sequence Annotation Info.	# of Proteins
	No defined Interpro term	7960
	IPR019998 : Membrane insertion protein, OxaA/YidC, bacterial	103
	IPR017735 : Type VI secretion system, FHA domain-containing, IPR019998 : Membrane insertion protein, OxaA/YidC, bacterial	10
	IPR017735 : Type VI secretion system, FHA domain-containing	9
	IPR012644 : Conserved hypothetical protein FYDLN acid	8			Sequence Annotation Info.	# of Proteins
	IPR008427 : Extracellular membrane protein, CFEM domain	8			No defined InterPro term	7960
	IPR013046 : Phage-related baseplate assembly protein V, IPR019998 : Membrane insertion protein, OxaA/YidC, bacterial	7			Single InterPro term	256
	IPR022268 : Conserved hypothetical protein CHP03809	6			Two InterPro terms	50
	IPR003172 : MD-2-related lipid-recognition	6			Three InterPro terms	8
	IPR016191 : Ribonuclease/ribotoxin	6			Four InterPro terms	1
	IPR017731 : Type VI secretion system, IcmF, IPR019998 : Membrane insertion protein, OxaA/YidC, bacterial	6			Total	8275
	IPR015880 : Zinc finger, C2H2-like	5
	IPR019998 : Membrane insertion protein, OxaA/YidC, bacterial, IPR022268 : Conserved hypothetical protein CHP03809	5
	IPR017560 : Cytochrome c-type biogenesis protein CcmI	5
	IPR013046 : Phage-related baseplate assembly protein V	4
	IPR007087 : Zinc finger, C2H2-type, IPR015880 : Zinc finger, C2H2-like	4
	IPR017803 : Conserved hypothetical protein CHP03437, C-terminal, Solibacter usitatus	4
	IPR019838 : Conserved hypothetical protein CHP02598	3
	IPR011344 : Single-strand DNA-binding	3
	IPR011754 : Myxococcus xanthus paralogous protein 2268	3
	IPR021054 : Cell wall galactomannoprotein	3
	IPR006311 : Twin-arginine translocation pathway, signal sequence	3
	IPR006491 : Plasmodium yoelii subtelomeric PYST-C2	2
	IPR006311 : Twin-arginine translocation pathway, signal sequence, IPR019998 : Membrane insertion protein, OxaA/YidC, bacterial	2
	IPR006389 : Early transcribed membrane protein (ETRAMP)	2
	IPR018620 : Ubiquitin 3 binding protein But2	2
	IPR017803 : Conserved hypothetical protein CHP03437, C-terminal, Solibacter usitatus, IPR019998 : Membrane insertion protein, OxaA/YidC, bacterial	2
	IPR011743 : Caa(3)-type oxidase, subunit IV	2
	IPR001878 : Zinc finger, CCHC-type	2
	IPR000772 : Ricin B lectin, IPR008997 : Ricin B-related lectin	2
	IPR007087 : Zinc finger, C2H2-type	2
	IPR011737 : Conserved hypothetical protein CHP02206, TP0381	2
	IPR006501 : Pectinesterase inhibitor	2
	IPR009007 : Peptidase aspartic, catalytic	2
	IPR010145 : CRISPR-associated protein, SAG0894	2
	IPR003014 : PAN-1 domain	2
	IPR010800 : Glycine rich protein	1
	IPR000489 : Pterin-binding	1
	IPR017734 : Type VI secretion system, lipoprotein VCA0113	1
	IPR001338 : Hydrophobin, fungi	1
	IPR004121 : Human herpesvirus K1 glycoprotein, C-terminal, IPR019998 : Membrane insertion protein, OxaA/YidC, bacterial	1
	IPR017731 : Type VI secretion system, IcmF, IPR017735 : Type VI secretion system, FHA domain-containing, IPR019998 : Membrane insertion protein, OxaA/YidC, bacterial	1
	IPR000772 : Ricin B lectin	1
	IPR017442 : Serine/threonine-protein kinase-like domain	1
	IPR007087 : Zinc finger, C2H2-type, IPR022755 : Zinc finger, double-stranded RNA binding	1
	IPR008427 : Extracellular membrane protein, CFEM domain, IPR014005 : Extracellular membrane protein, CFEM domain, fungi	1
	IPR006461 : Uncharacterised protein family Cys-rich	1
	IPR020587 : DNA recombination/repair protein RecA, monomer-monomer interface	1
	IPR014263 : Methanolan biosynthesis EpsI	1
	IPR013491 : Tape measure domain	1
	IPR002075 : Nuclear transport factor 2	1
	IPR003323 : Ovarian tumour, otubain	1
	IPR001064 : Beta/gamma crystallin	1
	IPR001810 : F-box domain, cyclin-like, IPR022364 : F-box domain, Skp2-like	1
	IPR001969 : Peptidase aspartic, active site	1
	IPR012589 : ATPase proteolipid	1
	IPR008972 : Cupredoxin	1
	IPR000421 : Coagulation factor 5/8 type, C-terminal	1
	IPR010701 : Protein of unknown function DUF1278	1
	IPR017576 : CRISPR-associated protein Csc1	1
	IPR015915 : Kelch-type beta propeller	1
	IPR009905 : 2-vinyl bacteriochlorophyllide hydratase	1
	IPR008985 : Concanavalin A-like lectin/glucanase	1
	IPR004301 : Nucleoplasmin, IPR012644 : Conserved hypothetical protein FYDLN acid	1
	IPR012597 : Fungal mating-type pheromone	1
	IPR021712 : Uncharacterised protein family UPF0506	1
	IPR017987 : Wilm's tumour protein	1
	IPR000104 : Antifreeze protein, type I, IPR017731 : Type VI secretion system, IcmF, IPR019998 : Membrane insertion protein, OxaA/YidC, bacterial	1
	IPR007087 : Zinc finger, C2H2-type, IPR015880 : Zinc finger, C2H2-like, IPR019401 : Zinc finger, CHCC-type	1
	IPR021109 : Peptidase aspartic	1
	IPR014066 : Arsenite oxidase, large subunit	1
	IPR004689 : UDP-galactose transporter	1
	IPR017735 : Type VI secretion system, FHA domain-containing, IPR019998 : Membrane insertion protein, OxaA/YidC, bacterial, IPR022268 : Conserved hypothetical protein CHP03809	1
	IPR008979 : Galactose-binding domain-like	1
	IPR004590 : DNA single-strand annealing protein RecT	1
	IPR011935 : Conserved hypothetical protein CHP02231	1
	IPR017735 : Type VI secretion system, FHA domain-containing, IPR017803 : Conserved hypothetical protein CHP03437, C-terminal, Solibacter usitatus, IPR019998 : Membrane insertion protein, OxaA/YidC, bacterial, IPR022268 : Conserved hypothetical protein CHP03809	1
	IPR011928 : Pseudomonas phage MP22, ORF50, gene transfer agent-like	1
	IPR010916 : TonB box, conserved site	1
	IPR013442 : CRISPR-associated protein APE2256	1
	IPR011871 : Fibrobacter succinogenes major paralogous domain	1
	IPR022283 : ParB-related, ThiF-related cassette, protein F	1
	IPR023112 : Antifungal protein domain	1
	IPR000104 : Antifreeze protein, type I, IPR017803 : Conserved hypothetical protein CHP03437, C-terminal, Solibacter usitatus, IPR019998 : Membrane insertion protein, OxaA/YidC, bacterial	1
	IPR008997 : Ricin B-related lectin	1
	IPR010207 : Electron transport complex, RnfB	1
	IPR000896 : Hemocyanin, copper-containing	1
	IPR011935 : Conserved hypothetical protein CHP02231, IPR019998 : Membrane insertion protein, OxaA/YidC, bacterial	1
	IPR001623 : Heat shock protein DnaJ, N-terminal	1
	IPR002575 : Aminoglycoside phosphotransferase	1
	IPR012644 : Conserved hypothetical protein FYDLN acid, IPR017735 : Type VI secretion system, FHA domain-containing	1
	IPR010171 : CRISPR-associated protein, MJ1666	1
	IPR006429 : Phage portal protein, lambda	1
	IPR000254 : Cellulose-binding domain, fungal	1
	IPR017803 : Conserved hypothetical protein CHP03437, C-terminal, Solibacter usitatus, IPR019998 : Membrane insertion protein, OxaA/YidC, bacterial, IPR022268 : Conserved hypothetical protein CHP03809	1
	IPR011058 : Cyanovirin-N	1
	IPR006501 : Pectinesterase inhibitor, IPR008997 : Ricin B-related lectin	1
	IPR000086 : NUDIX hydrolase domain, IPR015797 : NUDIX hydrolase domain-like	1
	IPR004451 : Conserved hypothetical protein CHP00270	1
	IPR002831 : Transcription regulator TrmB, N-terminal, IPR011991 : Winged helix-turn-helix transcription repressor DNA-binding	1
	IPR023395 : Mitochondrial carrier domain	1
	IPR013046 : Phage-related baseplate assembly protein V, IPR019837 : Conserved hypothetical protein CHP02597, C-terminal, IPR019998 : Membrane insertion protein, OxaA/YidC, bacterial	1
	IPR015916 : Galactose oxidase, beta-propeller	1
	IPR012644 : Conserved hypothetical protein FYDLN acid, IPR019998 : Membrane insertion protein, OxaA/YidC, bacterial	1
	IPR019962 : Conserved hypothetical protein CHP03663	1
	IPR013381 : CRISPR-associated protein Cse1	1
	IPR002168 : Lipase, GDXG, active site, IPR013094 : Alpha/beta hydrolase fold-3	1
	IPR019837 : Conserved hypothetical protein CHP02597, C-terminal	1
	IPR007227 : Cell shape-determining protein MreD	1
	IPR000086 : NUDIX hydrolase domain	1
	IPR007087 : Zinc finger, C2H2-type, IPR013087 : Zinc finger, C2H2-type/integrase, DNA-binding, IPR015880 : Zinc finger, C2H2-like	1
	IPR013083 : Zinc finger, RING/FYVE/PHD-type	1
		8275
